# Supplementary material for: New family of polyamine macrocycles containing 2,5-diphenyl[1,3,4]oxadiazole as a signaling unit. Synthesis, acid–base and spectrophotometric properties
Source: Royal Society of Chemistry journal article supplement (doi:10.1039/b921053a), 2010-01-01

**6a**  $^1\text{H-NMR}$  (200.13 MHz,  $\text{CDCl}_3$ )

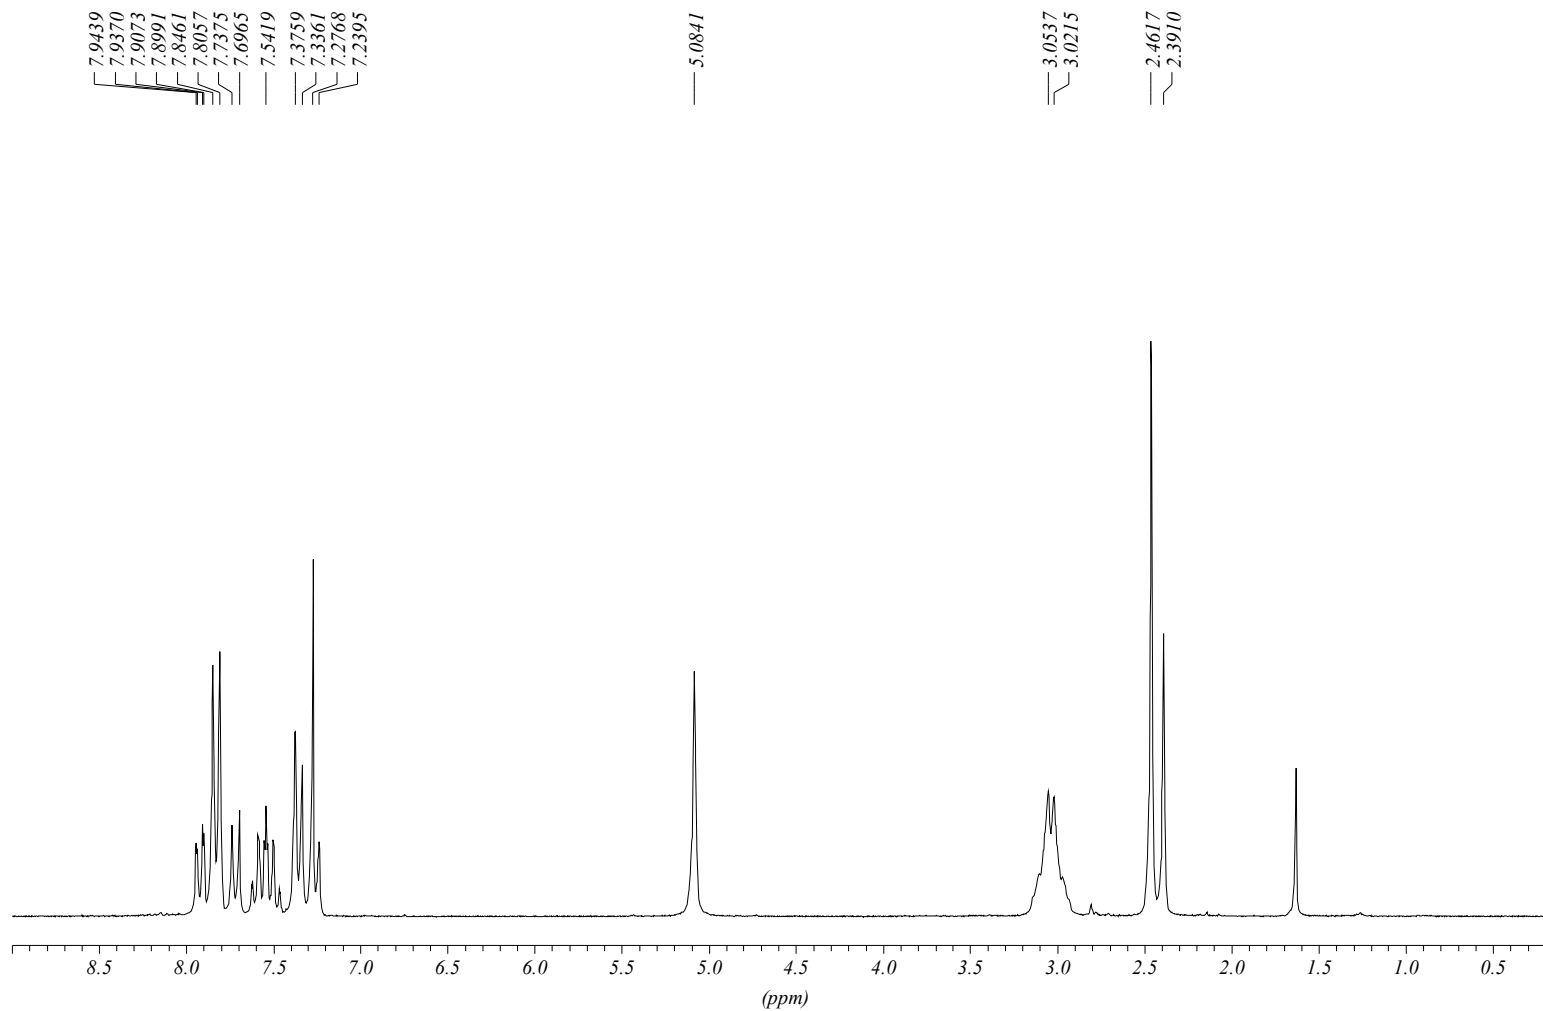

**6a**  $^{13}\text{C}$ -NMR (50.33 MHz,  $\text{CDCl}_3$ )

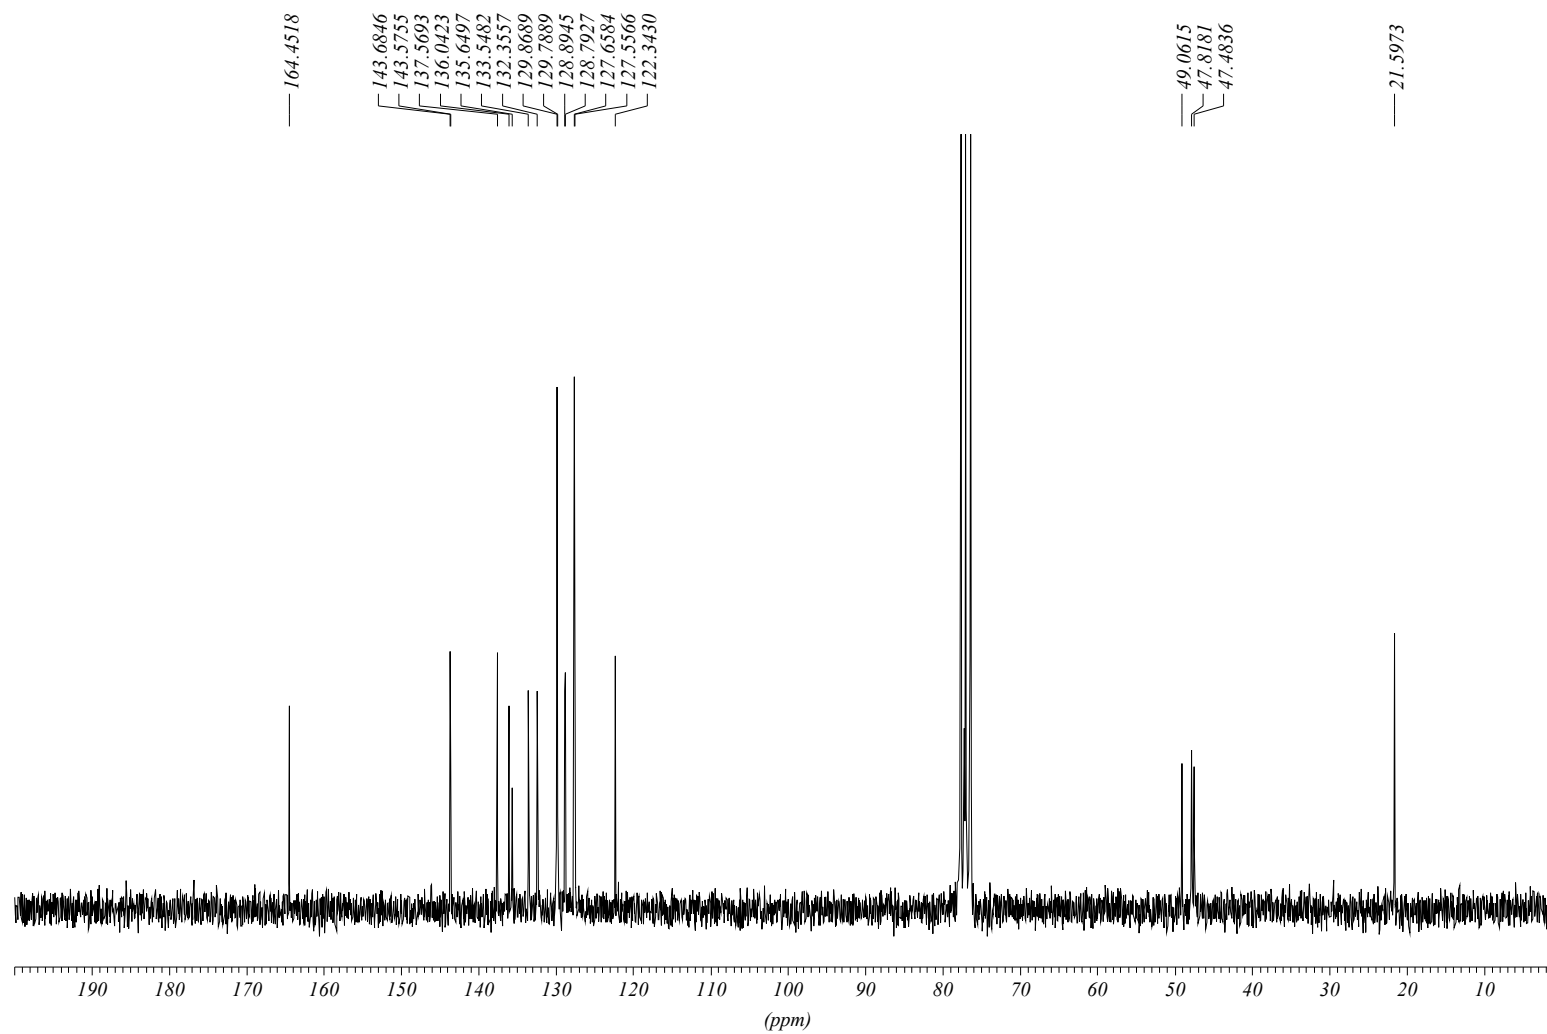

**6b** <sup>1</sup>H-NMR (200.13 MHz, CDCl<sub>3</sub>)

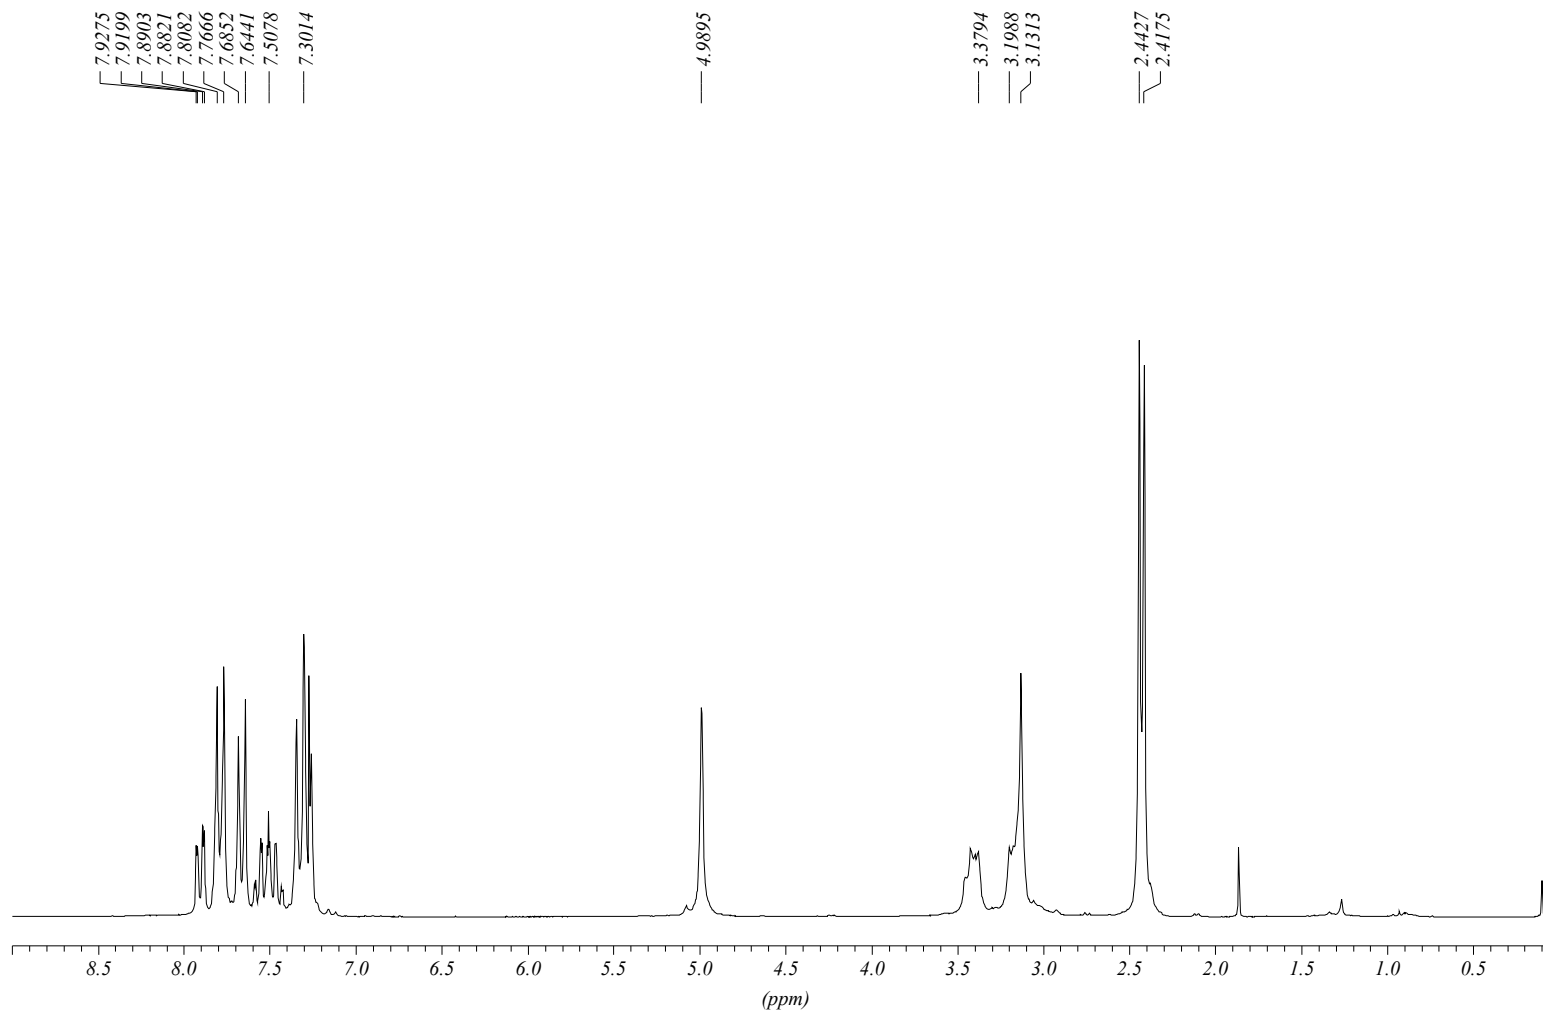

**6b**  $^{13}\text{C}$ -NMR (50.33 MHz,  $\text{CDCl}_3$ )

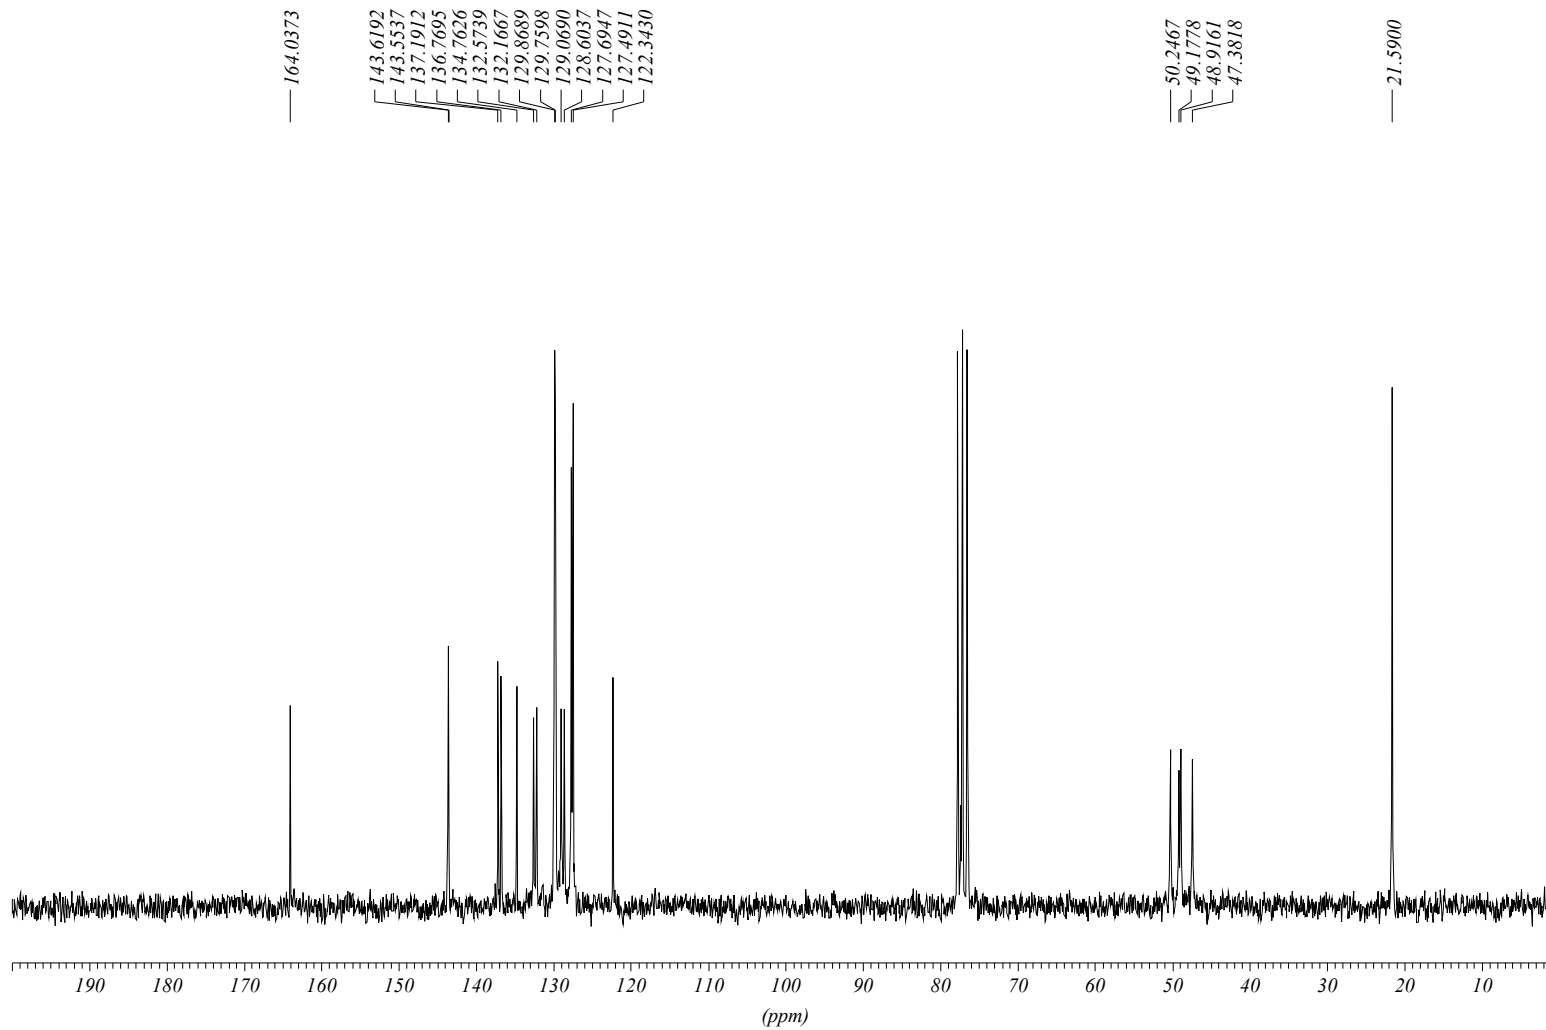

6c  $^1\text{H-NMR}$  (200.13 MHz,  $\text{CDCl}_3$ )

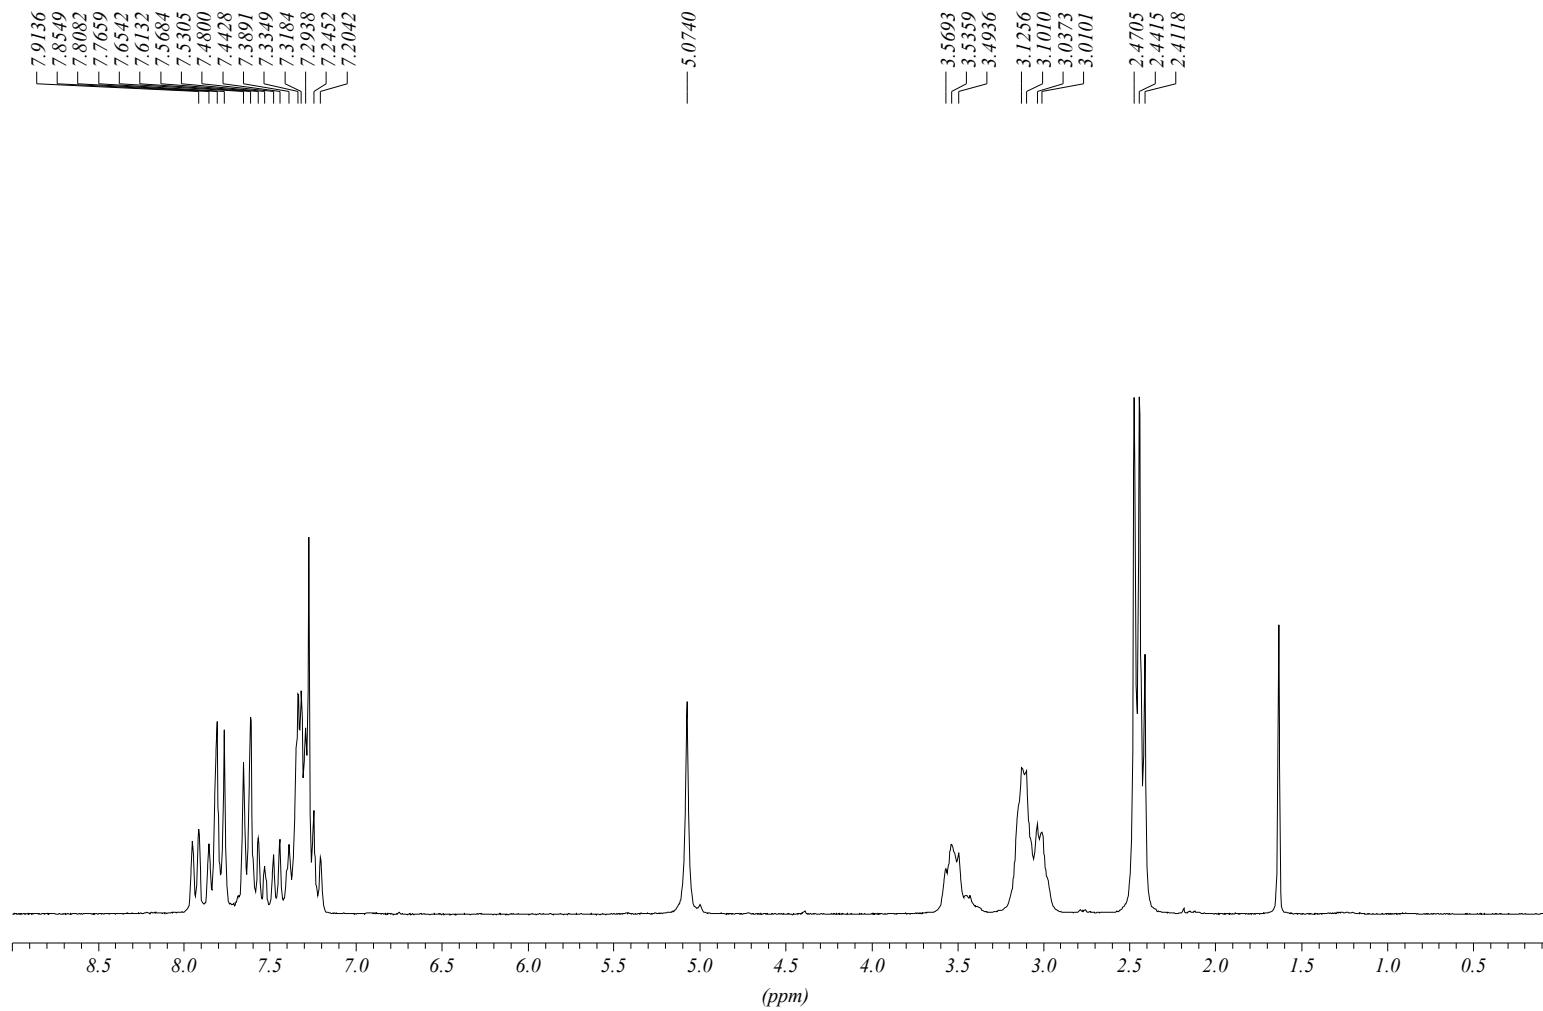

**6c**  $^{13}\text{C}$ -NMR (50.33 MHz,  $\text{CDCl}_3$ )

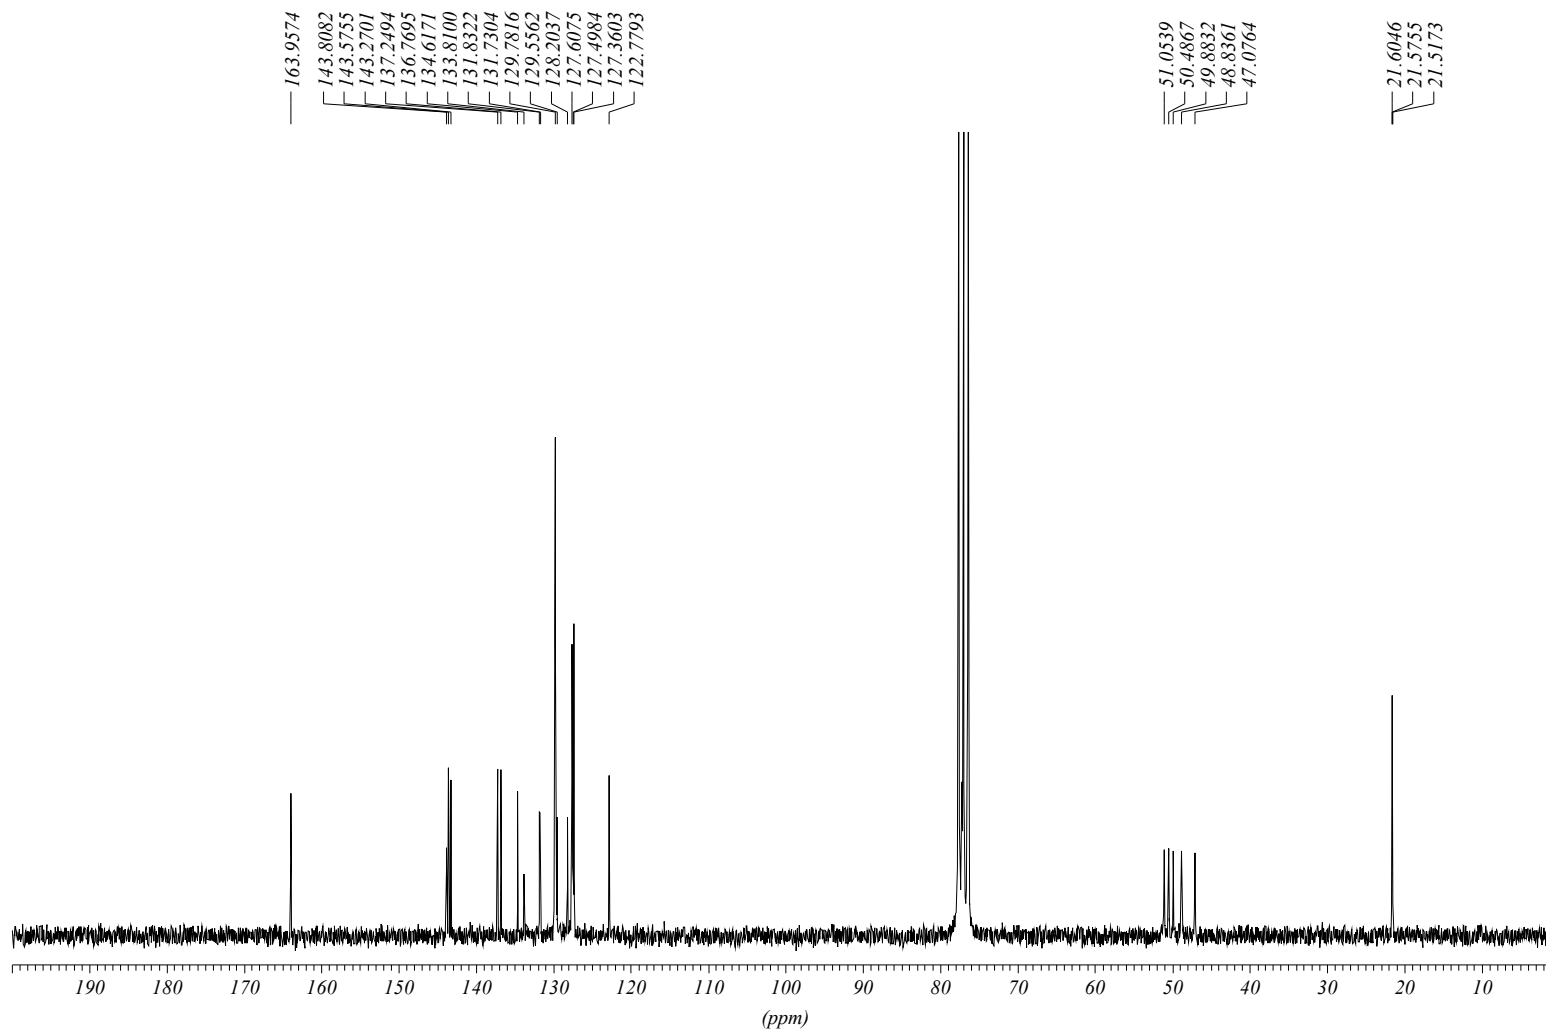

L1  $^1\text{H-NMR}$  (200.13 MHz,  $\text{DMSO-}d_6$ )

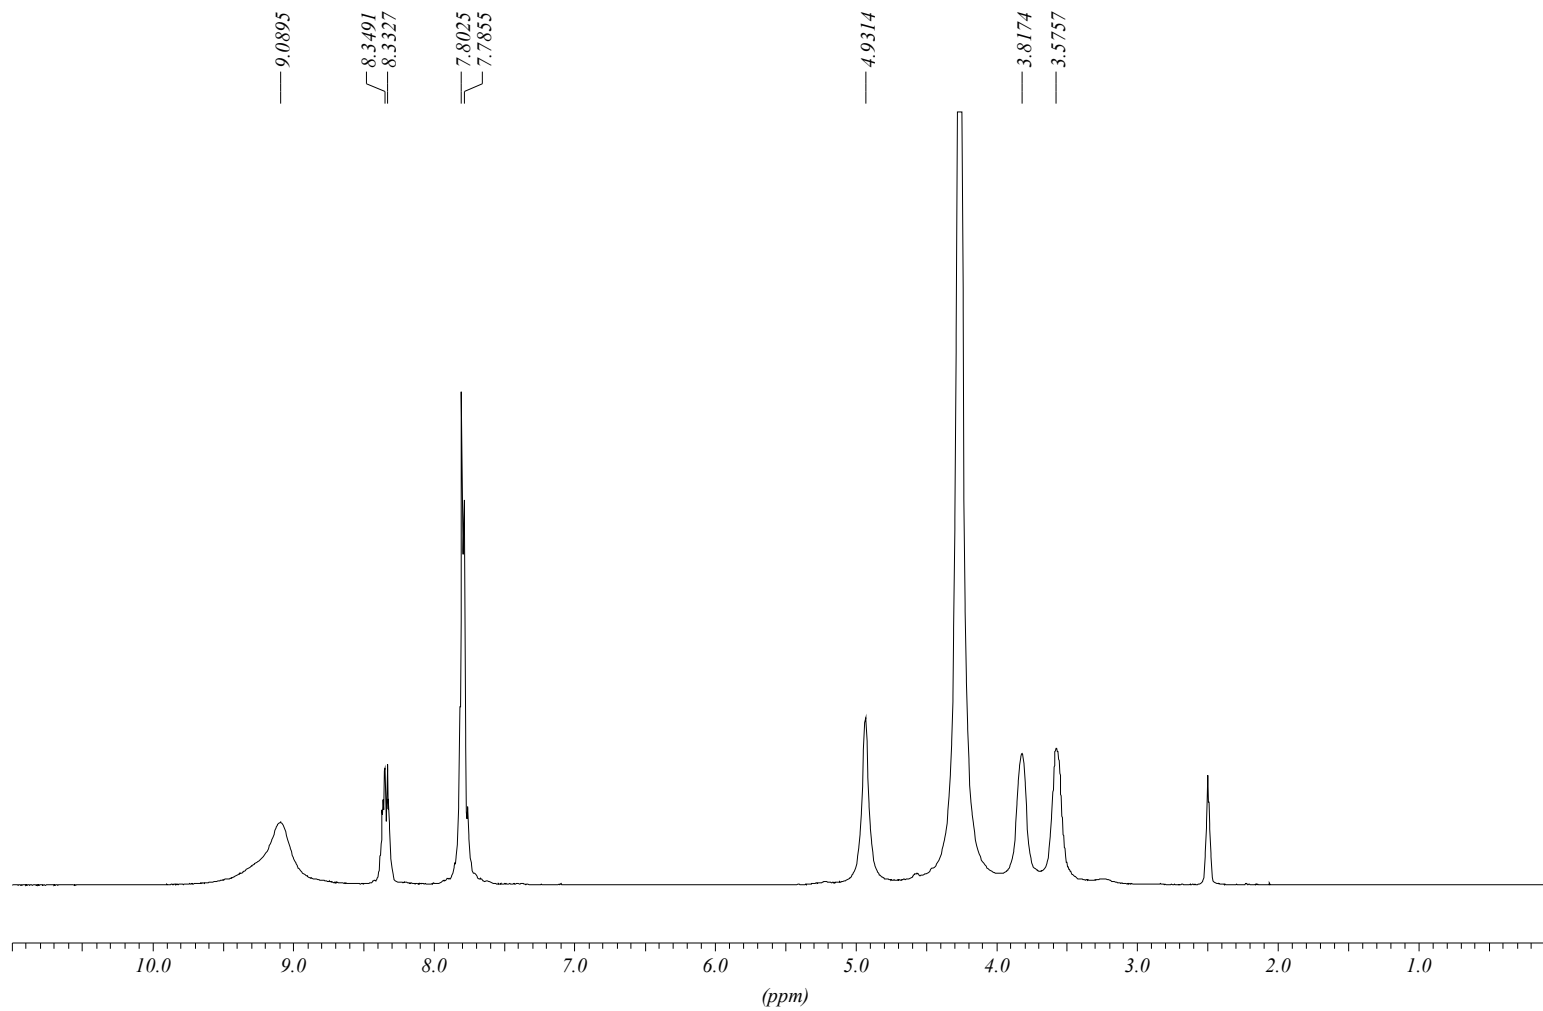

L1  $^{13}\text{C}$ -NMR (50.33 MHz, DMSO- $d_6$ )

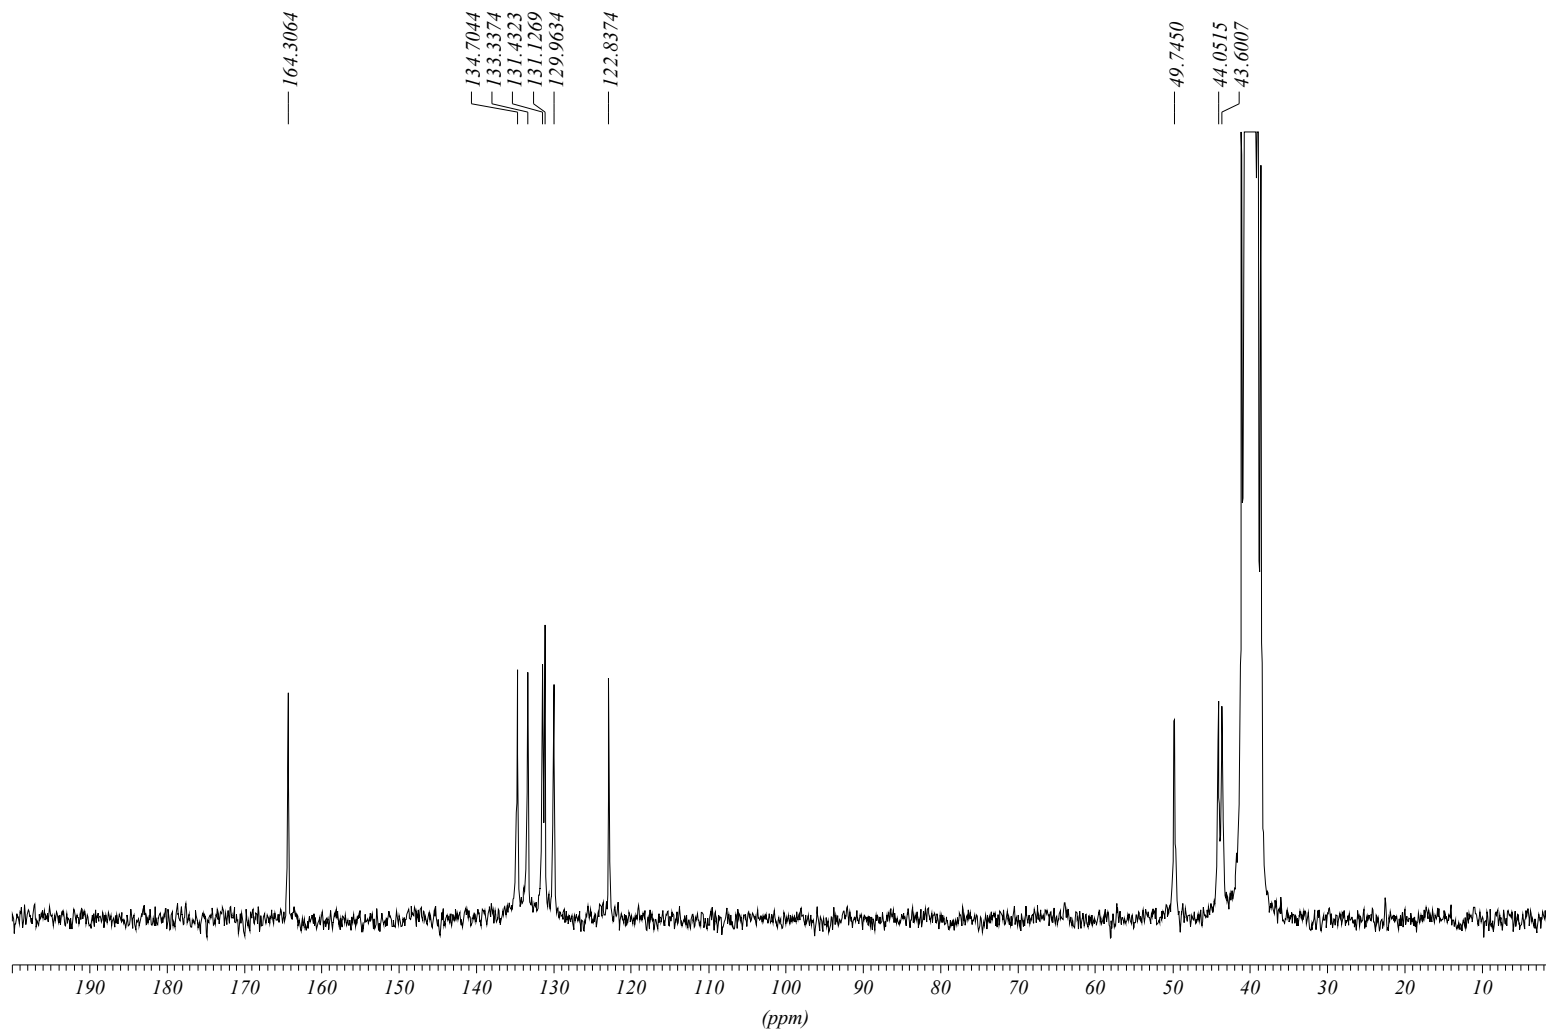



L2  $^1\text{H-NMR}$  (200.13 MHz,  $\text{D}_2\text{O}$  pH=3)

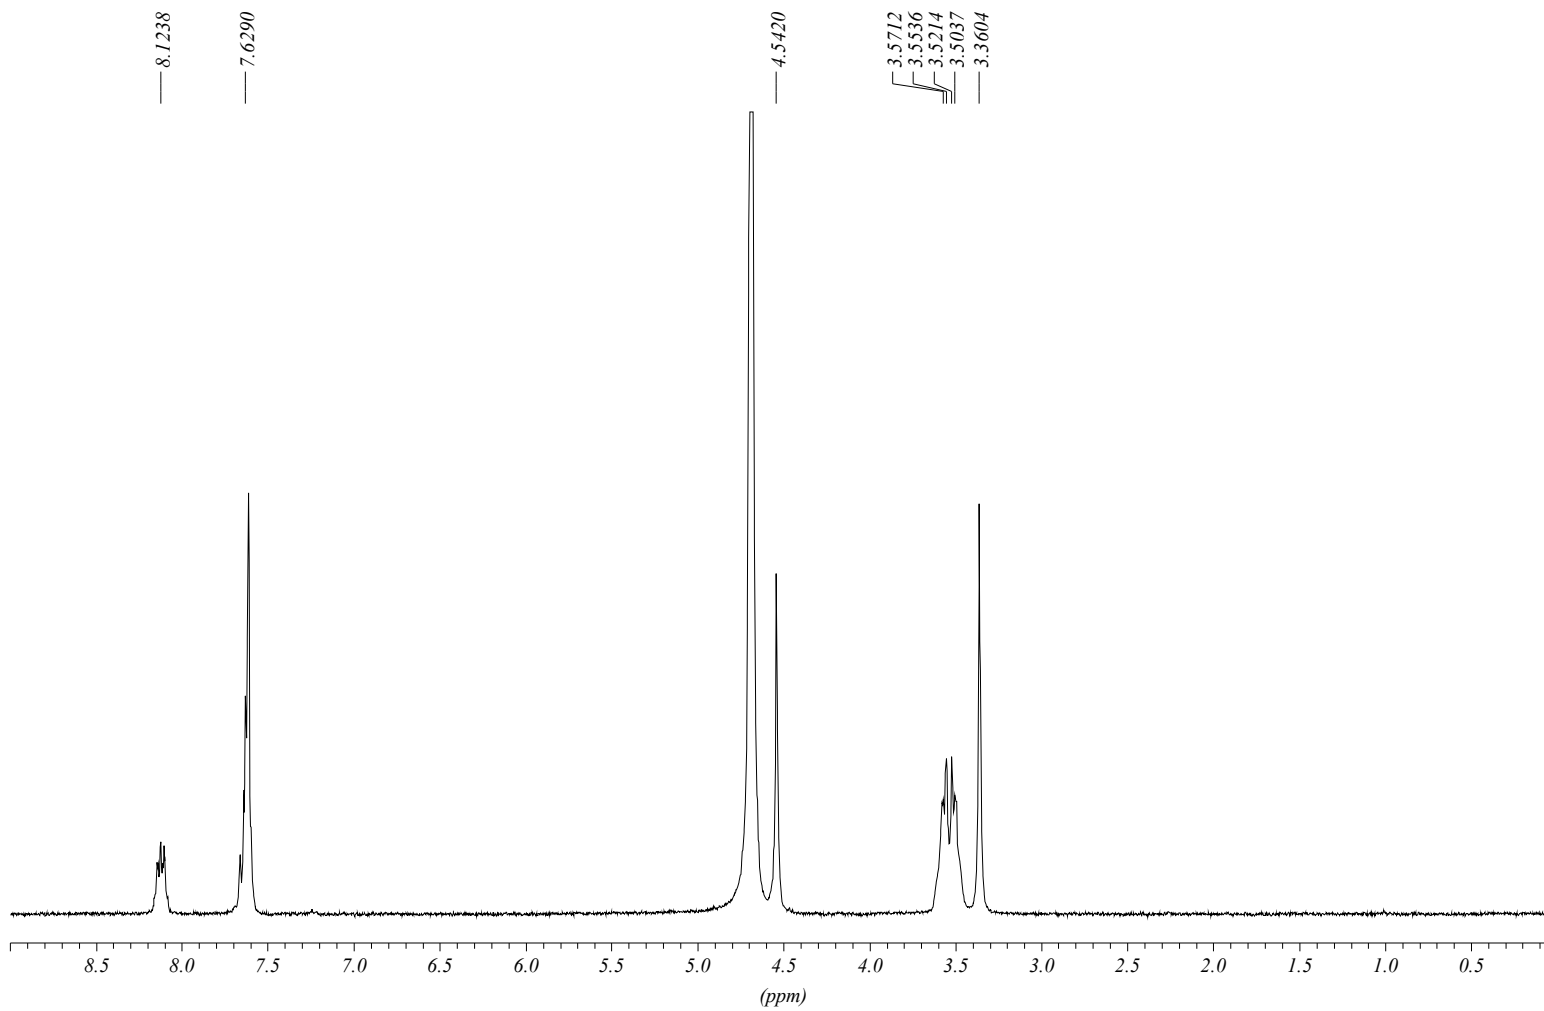

**L2**  $^{13}\text{H}$ -NMR (50.33 MHz,  $\text{D}_2\text{O}$  pH=3)

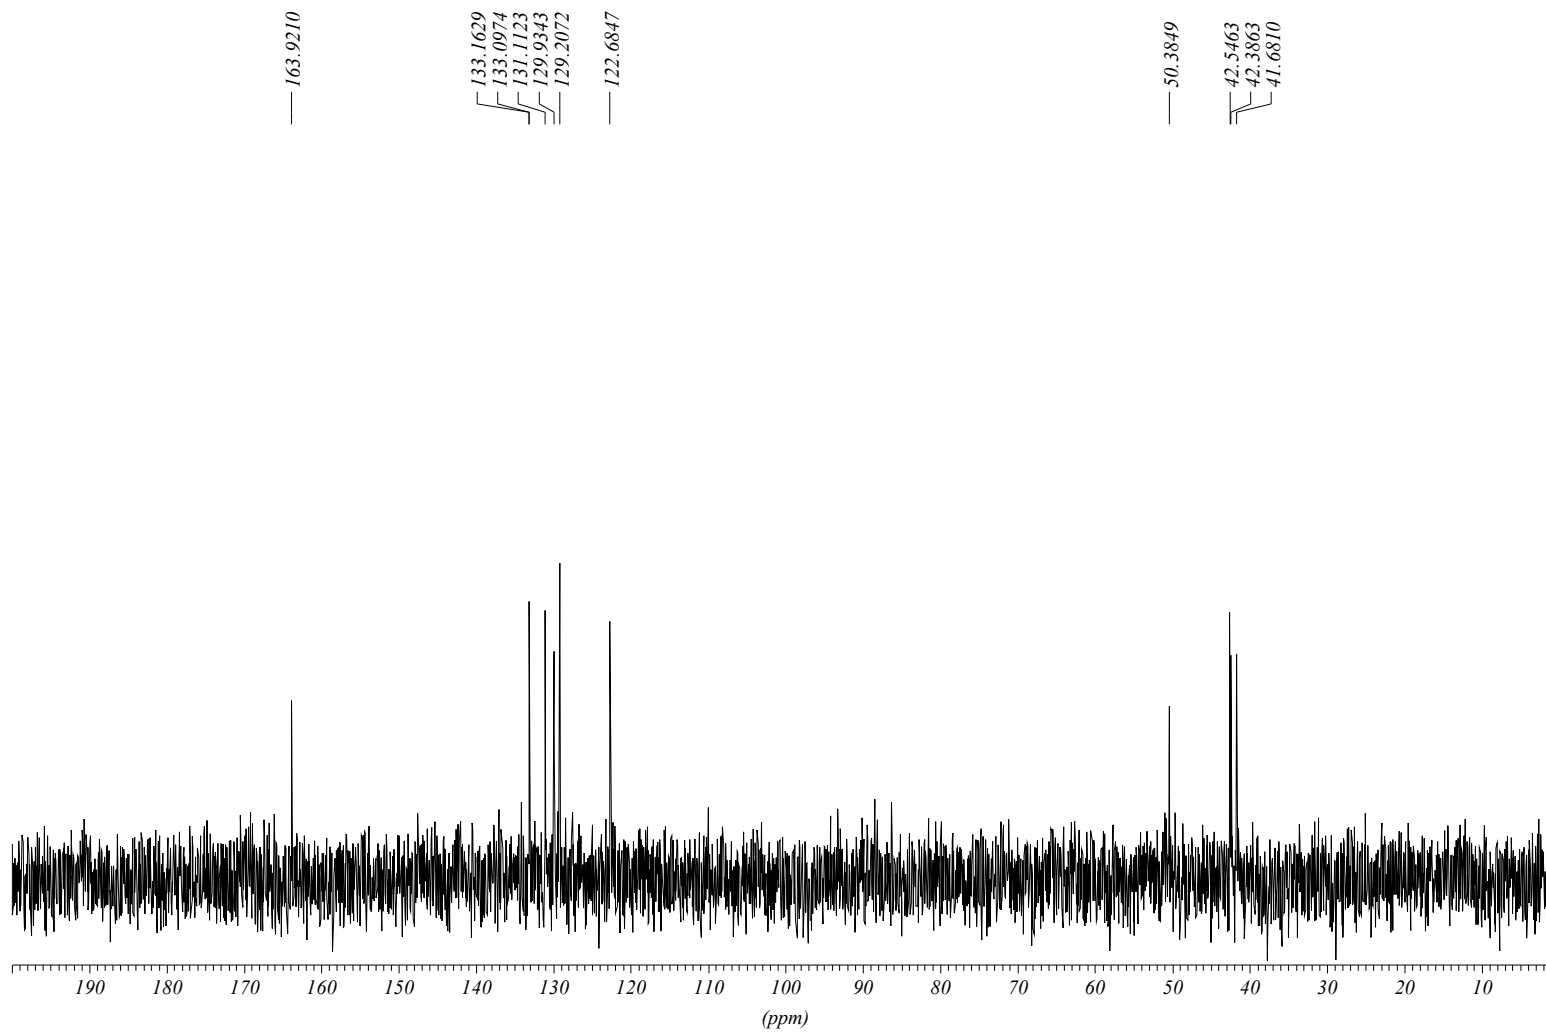

L3  $^1\text{H-NMR}$  (200.13 MHz,  $\text{D}_2\text{O}$  pH=3)

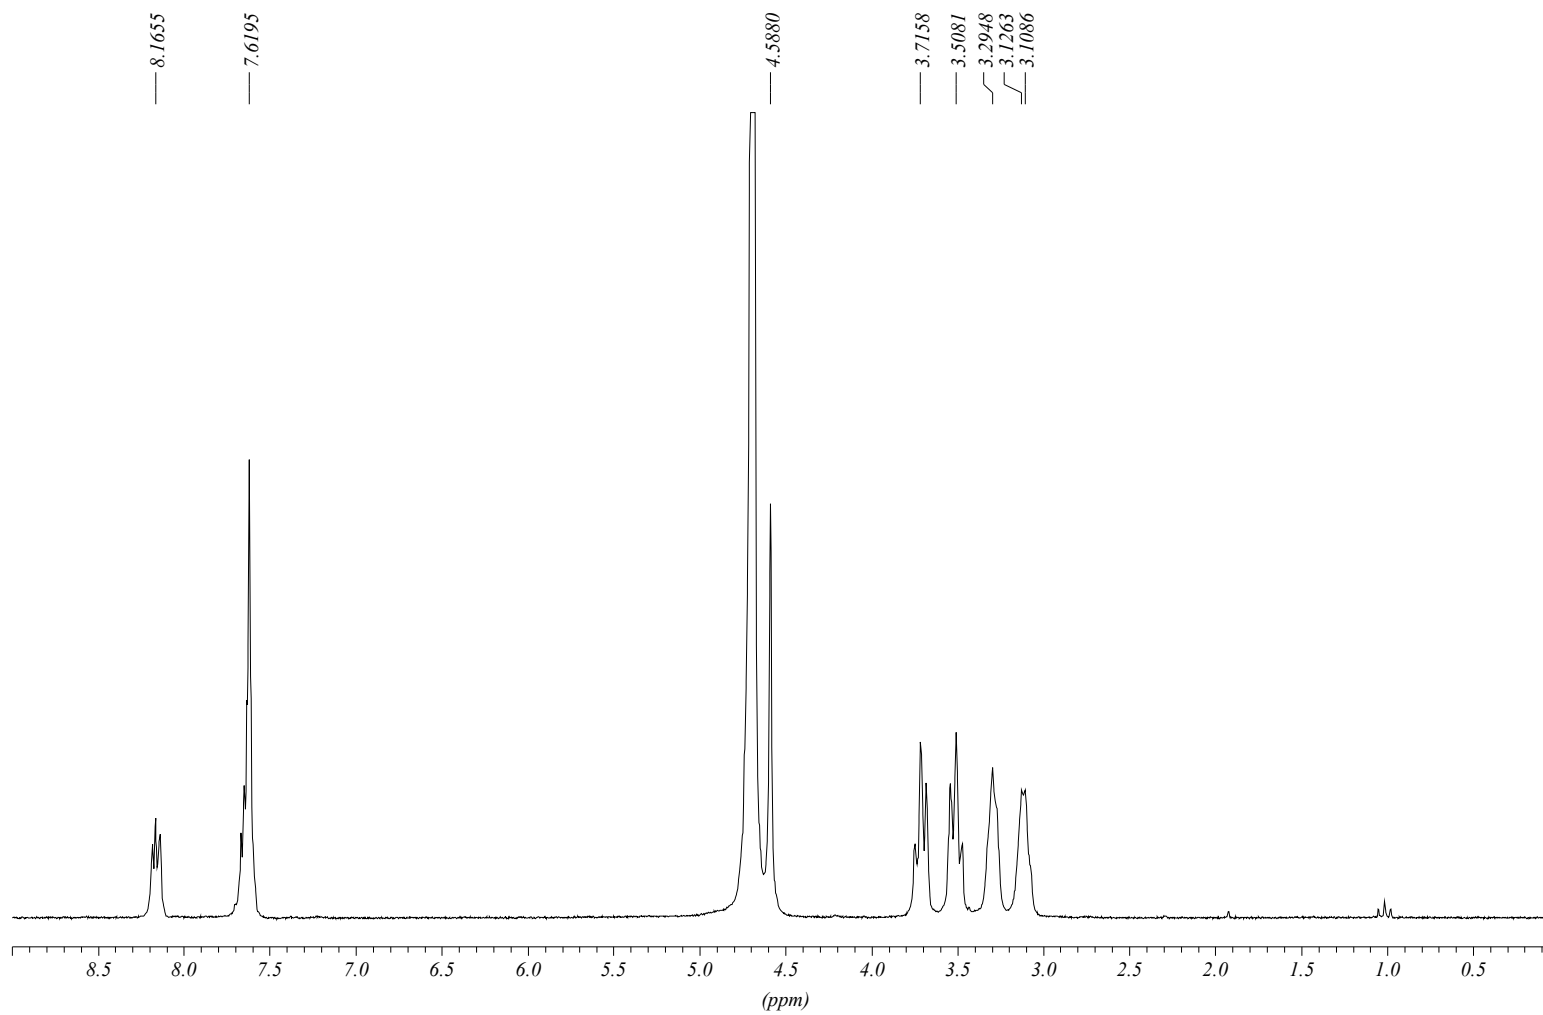

L3  $^1\text{H-NMR}$  (50.33 MHz,  $\text{D}_2\text{O}$ , pH=3)

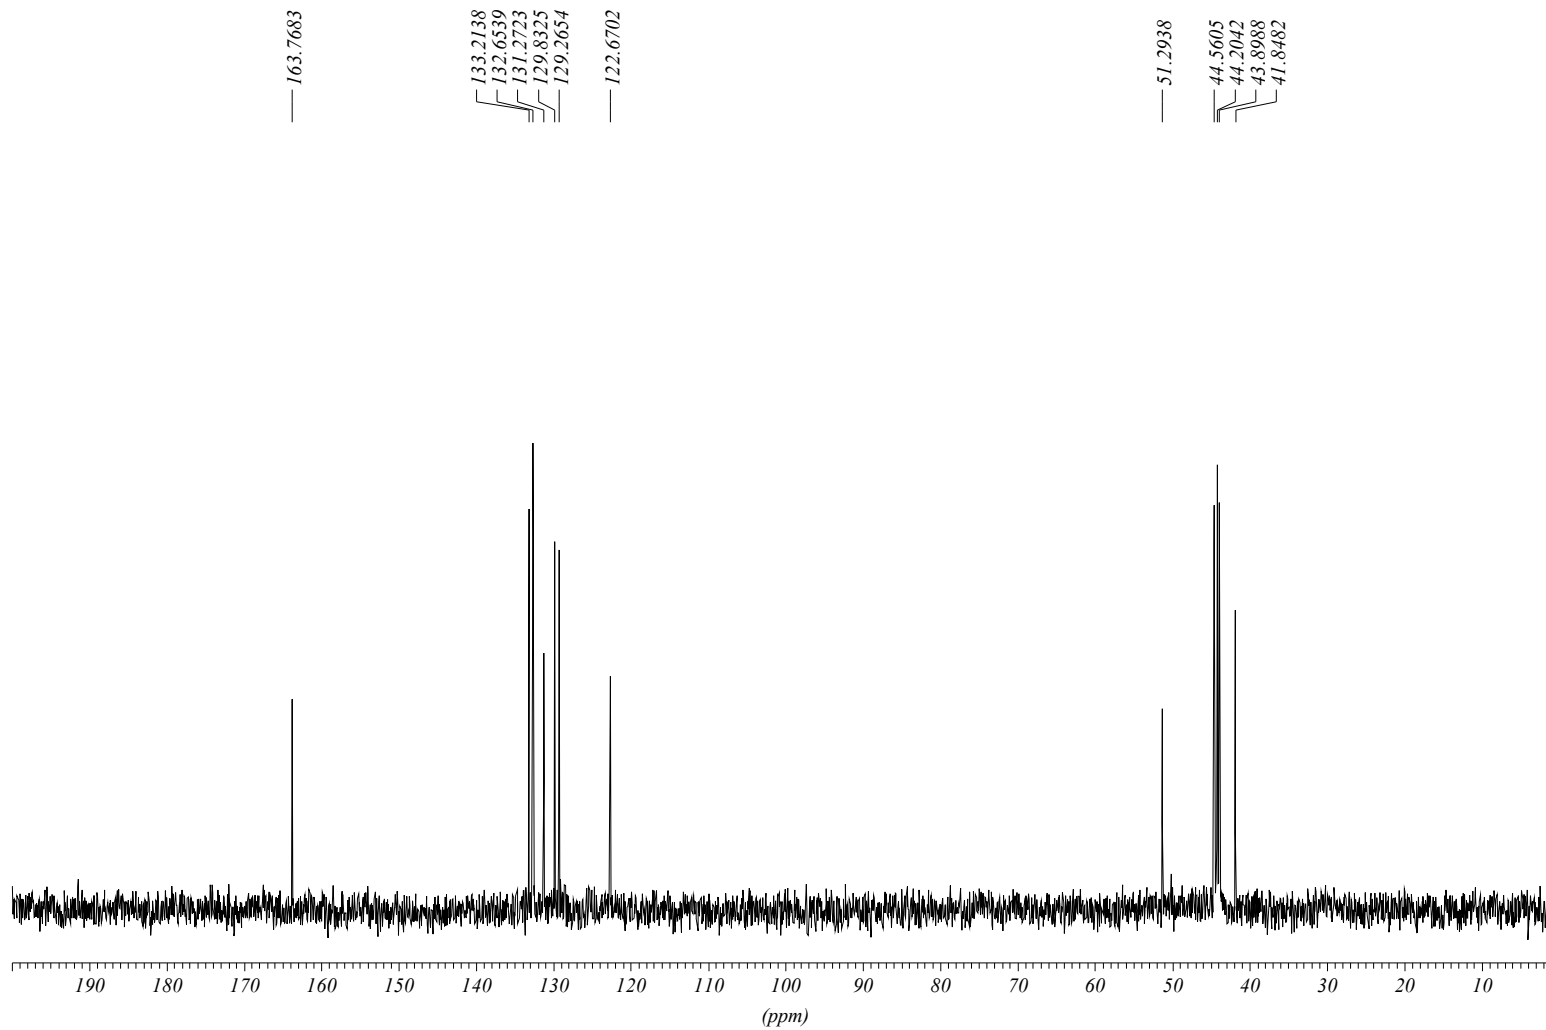

Supplement: b921053a.pdf [file b921053a.pdf]
